# Supplementary material for: Genetic structure and diversity of Nodularia douglasiae (Bivalvia: Unionida) from the middle and lower Yangtze River drainage
Source: PubMed Central journal article supplement (PMC5738091; doi:10.1371/journal.pone.0189737), 2017-12-20
Supplement: pone.0189737.s001.pdf [file pone.0189737.s001.pdf]

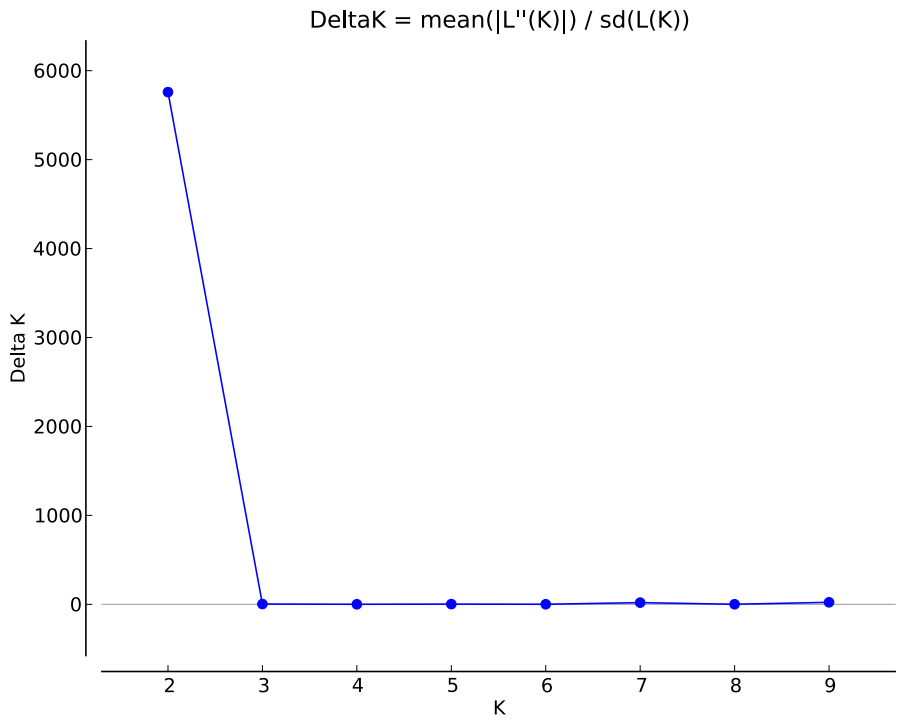

a)

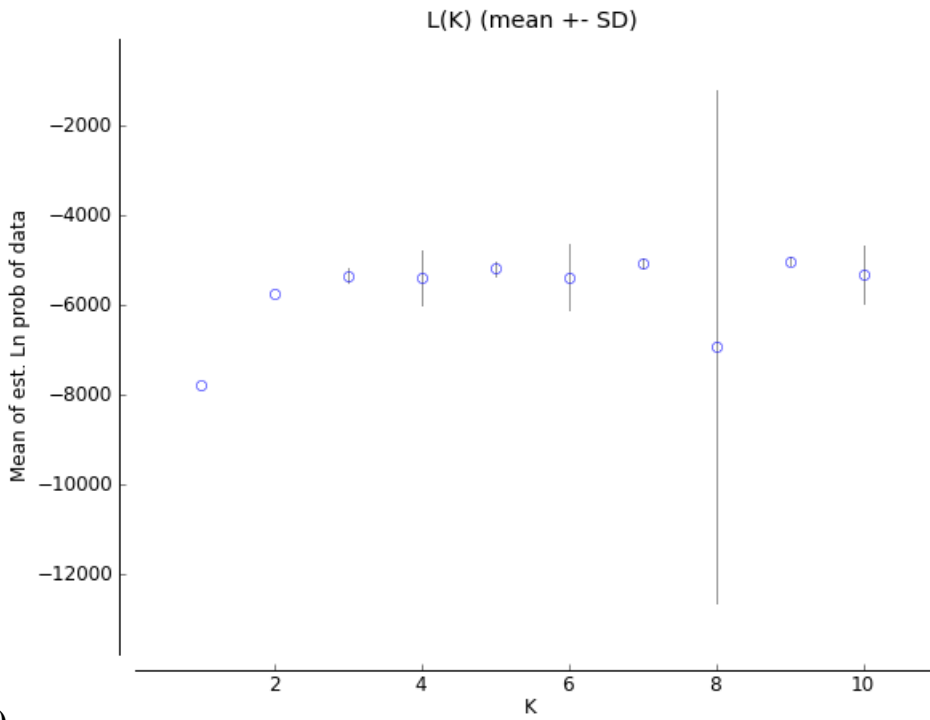

b)

**S1 Fig.** STRUCTURE HARVESTER results to determine the most likely  $K$  value. The Evanno et al. method, which compares the  $\Delta K$  between sequential  $K$  values (a) and the comparison of the mean of the estimate of the natural log of the probability of the data amongst  $K$  values, with the circle centered over the mean and the bar indicating the standard error (b).
